# Supplementary material for: Cue- versus reward-encoding basolateral amygdala projections to nucleus accumbens
Source: eLife. 2023 Nov 14;12:e89766. doi: 10.7554/eLife.89766 (PMC10645419; doi:10.7554/eLife.89766)
Supplement: Figure 1—source data 1. [file elife-89766-fig1-data1.xlsx]

## Sheet: Fig.1L
Rspo2-cre x D1-td Tomato EPSC						blank
blank	D1 MSNs EPSC amplitude (pA)				D2 MSNs EPSC amplitude (pA)
	Basal	NBQX+AP5			Basal	NBQX+AP5
Cell 1	-100.577	-11.5845		Cell 1	-127.147	-12.987
Cell 2	-55.2226	-11.8405		Cell 2	-95.0907	-12.0457
Cell 3	-76.0019	-16.1085		Cell 3	-178.196	-22.7803
Cell 4	-134.957	-12.965		Cell 4	-192.772	-5.69936
Cell 5	-166.279	-10.804		Cell 5	-85.2015	-5.45652
Cell 6	-69.2157	-13.6168		Cell 6	-73.2375	-3.70281
Cell 7	-33.4122	-4.99342
Cell 8	-103.242	-8.52382
Cell 9	-67.2665	-3.95615

## Sheet: Fig.1X
Cartpt-cre x D1-td Tomato EPSC						blank
	D1 MSNs EPSC amplitude (pA)				D2 MSNs EPSC amplitude (pA)
	Basal	NBQX+AP5			Basal	NBQX+AP5
Cell 1	-222.159	-9.10732		Cell 1	-138.378	-12.8493
Cell 2	-91.2004	-17.5466		Cell 2	-191.829	-12.6394
Cell 3	-21.1032	-2.28519		Cell 3	-248.954	-14.1109
Cell 4	-235.631	-4.88546		Cell 4	-36.4821	-11.9733
Cell 5	-402.576	-10.4628		Cell 5	-110.316	-17.2675
Cell 6	-91.2113	-4.50215		Cell 6	-112.356	-6.51176
				Cell 7	-224.788	-8.28389

## Sheet: Fig.1Z
blank	blank
blank		Rspo2 D1 P2/P1
	Pair pulse intervals	cell 1	cell 2	cell 3	cell 4	cell 5	cell 6
	25ms	0.193962	0.207807	0.334765	0.446918	0.42541	0.534106
	50ms	0.881177	0.98088	0.939004	0.920607	0.890062	1.83535
	100ms	1.28866	1.11998	1.22715	0.839488	0.986419	1.32388
	200ms	1.10948	1.17067	1.23547	0.931881	0.826647	1.4323
blank
blank
blank
blank		Rspo2 D2 P2/P1
blank	Pair pulse intervals	cell 1	cell 2	cell 3	cell 4	cell 5	cell 6
	25ms	0.415693	0.598762	0.539386	0.716495	1.00336	0.446365
	50ms	1.03416	1.2859	1.3588	1.1869	1.13075	0.548205
	100ms	1.11425	1.37889	1.27925	1.06918	1.10304	0.654113
	200ms	1.06139	1.26372	1.39047	1.06675	1.20172	0.699483
blank
blank
blank
blank		Cartpt D1 P2/P1
	Pair pulse intervals	cell 1	cell 2	cell 3	cell 4	cell 5	cell 6
	25ms	0.068132	0.093289	0.178793	0.497482	0.67405	0.449048
	50ms	0.638404	0.501612	0.713823	0.755388	0.69359	0.733089
	100ms	0.725736	0.591452	0.822274	0.698509	0.741981	0.753052
	200ms	0.937858	0.667637	0.727243	0.78737	0.779792	0.781734
blank
blank
blank
blank		Carpt D2 P2/P1
	Pair pulse intervals	cell 1	cell 2	cell 3	cell 4	cell 5	cell 6
	25ms	0.326534	0.164913	0.04218	0.143705	0.340354	0.692155
	50ms	0.701383	0.688126	0.583889	0.621111	0.682867	0.9522
	100ms	0.746786	0.67141	0.661927	0.670924	0.689707	0.958168
	200ms	0.743782	0.594402	0.727449	0.689714	0.683218	0.876474
