# Supplementary material for: Cue- versus reward-encoding basolateral amygdala projections to nucleus accumbens
Source: eLife. 2023 Nov 14;12:e89766. doi: 10.7554/eLife.89766 (PMC10645419; doi:10.7554/eLife.89766)
Supplement: Figure 2—source data 1. [file elife-89766-fig2-data1.xlsx]

## Sheet: Fig.2B
Rspo2-YFP	blank
20 Hz		YFP Active lever presses				YFP Inacitve lever presses				YFP Stimulation
	Day	Mouse 1	Mouse 2	Mouse 3	Mouse 4	Mouse 1	Mouse 2	Mouse 3	Mouse 4	Mouse 1	Mouse 2	Mouse 3	Mouse 4
	1	39	52	2	28	16	23	5	10	35	39	2	25
	2	45	25	11	26	12	26	1	17	43	21	10	25
	3	59	72	8	19	10	13	12	24	59	51	7	18
blank	blank
40 Hz		YFP Active lever presses				YFP Inacitve lever presses				YFP Stimulation
	Day	Mouse 1	Mouse 2	Mouse 3	Mouse 4	Mouse 1	Mouse 2	Mouse 3	Mouse 4	Mouse 1	Mouse 2	Mouse 3	Mouse 4
	1	35	30	27	16	38	70	39	40	34	30	22	16
	2	28	39	27	25	43	54	39	58	28	38	26	25
	3	32	37	31	30	37	45	27	30	31	37	28	29

## Sheet: Fig.2C
Ppp1r1b-YFP		blank
20 Hz		YFP Active lever presses				YFP Inacitve lever presses				YFP Stimulation
	Day	Mouse 1	Mouse 2	Mouse 3	Mouse 4	Mouse 1	Mouse 2	Mouse 3	Mouse 4	Mouse 1	Mouse 2	Mouse 3	Mouse 4
	1	6	10	8	25	4	4	21	12	6	9	8	24
	2	11	15	12	11	5	16	11	5	11	13	12	11
	3	14	18	23	12	4	13	2	6	14	17	22	12
blank	blank
40 Hz		YFP Active lever presses				YFP Inacitve lever presses				YFP Stimulation
	Day	Mouse 1	Mouse 2	Mouse 3	Mouse 4	Mouse 1	Mouse 2	Mouse 3	Mouse 4	Mouse 1	Mouse 2	Mouse 3	Mouse 4
	1	0	15	10	7	5	19	13	18	0	15	10	6
	2	6	14	6	6	9	23	9	24	6	14	5	6
	3	4	29	5	15	10	20	11	30	4	29	5	14

## Sheet: Fig.2D
Rspo2-ChR2	blank
20 Hz		ChR2 Active lever presses				ChR2 Inacitve lever presses				ChR2 Stimulation
	Day	Mouse 1	Mouse 2	Mouse 3	Mouse 4	Mouse 1	Mouse 2	Mouse 3	Mouse 4	Mouse 1	Mouse 2	Mouse 3	Mouse 4
	1	125	18	9	33	2	2	0	6	84	15	8	48
	2	106	3	55	56	0	0	10	7	64	2	44	57
	3	380	16	46	68	1	4	10	8	232	11	43	28
blank	blank
40 Hz		ChR2 Active lever presses				ChR2 Inacitve lever presses				ChR2 Stimulation
	Day	Mouse 1	Mouse 2	Mouse 3	Mouse 4	Mouse 1	Mouse 2	Mouse 3	Mouse 4	Mouse 1	Mouse 2	Mouse 3	Mouse 4
	1	2622	701	1800	404	12	37	13	64	2278	635	1345	386
	2	2900	710	1315	392	5	31	17	159	2488	583	1016	379
	3	2633	773	1574	337	2	18	12	130	2473	635	1212	319

## Sheet: Fig.2E
Ppp1r1b-ChR2		blank
20 Hz		ChR2 Active lever presses				ChR2 Inacitve lever presses				ChR2 Stimulation
	Day	Mouse 1	Mouse 2	Mouse 3	Mouse 4	Mouse 1	Mouse 2	Mouse 3	Mouse 4	Mouse 1	Mouse 2	Mouse 3	Mouse 4
	1	16	23	46	25	14	20	30	9	16	23	35	21
	2	13	25	32	16	14	10	39	7	13	24	31	14
	3	6	51	37	29	2	7	50	6	6	50	32	26
blank		blank
40 Hz		ChR2 Active lever presses				ChR2 Inacitve lever presses				ChR2 Stimulation
	Day	Mouse 1	Mouse 2	Mouse 3	Mouse 4	Mouse 1	Mouse 2	Mouse 3	Mouse 4	Mouse 1	Mouse 2	Mouse 3	Mouse 4
	1	310	310	2081	197	61	131	67	48	290	306	1930	195
	2	367	321	1688	232	35	80	32	46	336	321	1576	231
	3	300	363	1700	235	40	57	40	36	274	361	1618	230

## Sheet: Fig.2F
Rspo2-to-NAc		blank
blank		blank
blank		blank
	ChR2 ICSS sessions active lever presses				ChR2 Extinction sessions active lever presses
	Session 1	Session 2	Session 3		Session 1	Session 2	Session 3
Mouse 1	920	1042	1760		124	44	123
Mouse 2	225	349	507		80	30	37
Mouse 3	1913	2111	2350		147	49	27
Mouse 4	330	473	570		198	87	193
blank	blank
blank	blank
	ChR2 ICSS sessions inactive lever presses				ChR2 Extinction sessions inactive lever presses
	Session 1	Session 2	Session 3		Session 1	Session 2	Session 3
Mouse 1	10	3	4		20	11	7
Mouse 2	61	49	19		22	74	56
Mouse 3	5	5	7		16	15	6
Mouse 4	59	49	29		30	36	61
blank	blank
blank
blank
blank
	YFP ICSS sessions active lever presses				YFP Extinction sessions active lever presses
	Session 1	Session 2	Session 3		Session 1	Session 2	Session 3
Mouse 1	57	51	73		89	42	91
Mouse 2	40	29	20		13	68	46
Mouse 3	13	11	20		12	22	49
Mouse 4	53	65	59		24	50	81
blank
blank
	YFP ICSS sessions inactive lever presses				YFP Extinction sessions inactive lever presses
	Session 1	Session 2	Session 3		Session 1	Session 2	Session 3
Mouse 1	37	37	43		43	30	46
Mouse 2	37	24	17		20	20	66
Mouse 3	22	13	20		25	16	38
Mouse 4	53	65	59		39	25	55

## Sheet: Fig.2G
Ppp1r1b-to-NAc		blank
blank		blank
blank		blank
	ChR2 ICSS sessions active lever presses				ChR2 Extinction sessions active lever presses
	Session 1	Session 2	Session 3		Session 1	Session 2	Session 3
Mouse 1	470	394	338		137	113	74
Mouse 2	440	673	578		512	367	253
Mouse 3	945	1561	1306		691	496	562
Mouse 4	128	96	79		162	212	200
blank	blank
blank	blank
	ChR2 ICSS sessions inactive lever presses				ChR2 Extinction sessions inactive lever presses
	Session 1	Session 2	Session 3		Session 1	Session 2	Session 3
Mouse 1	70	47	43		56	42	29
Mouse 2	265	38	38		23	45	25
Mouse 3	65	33	37		65	43	34
Mouse 4	51	42	31		54	38	48
blank	blank
blank	blank
blank	blank
blank
	YFP ICSS sessions active lever presses				YFP Extinction sessions active lever presses
	Session 1	Session 2	Session 3		Session 1	Session 2	Session 3
Mouse 1	21	12	15		21	12	15
Mouse 2	23	42	27		23	42	27
Mouse 3	36	43	34		36	43	34
Mouse 4	10	10	13		10	10	13
blank	blank
blank	blank
	YFP ICSS sessions inactive lever presses				YFP Extinction sessions inactive lever presses
	Session 1	Session 2	Session 3		Session 1	Session 2	Session 3
Mouse 1	23	8	13		23	8	13
Mouse 2	11	17	10		11	17	10
Mouse 3	14	36	47		14	36	47
Mouse 4	6	10	5		6	10	5

## Sheet: Fig.2H
Rspo2-to-NAc		blank
blank		blank
blank		blank
Last day of ICSS					Cue-induced seeking
blank		blank
ChR2 Active	ChR2 inactive	eYFP Active	eYFP inactive		ChR2 Active	ChR2 inactive	eYFP Active	eYFP inactive
1137	23	73	43		28	11	89	51
402	24	20	17		3	9	13	20
1452	1	20	20		39	22	12	25
311	96	59	39		4	2	24	39

## Sheet: Fig. 2I
Ppp1r1b-to-NAc		blank
blank		blank
blank		blank
Last day of ICSS					Cue-induced seeking
blank		blank
ChR2 Active	ChR2 inactive	eYFP Active	eYFP inactive		ChR2 Active	ChR2 inactive	eYFP Active	eYFP inactive
216	16	17	20		119	23	7	6
269	10	57	27		278	57	31	9
687	28	45	19		212	29	12	4
142	53	21	25		68	21	12	21
