# Supplementary material for: Cue- versus reward-encoding basolateral amygdala projections to nucleus accumbens
Source: eLife. 2023 Nov 14;12:e89766. doi: 10.7554/eLife.89766 (PMC10645419; doi:10.7554/eLife.89766)
Supplement: Figure 3—source data 1. [file elife-89766-fig3-data1.xlsx]

## Sheet: Fig.3F
Rspo2-SSFO		blank
blank		blank
Active lever presses		blank
	Baseline (3 day prior)	Baseline (2 day prior)	Basesline (1 day prior)	Manipulation	1 day after stimulation
Mouse 1	9	13	33	33	34
Mouse 2	34	32	32	24	36
Mouse 3	11	18	39	42	47
Mouse 4	55	58	49	53	56
Mouse 5	34	54	46	47	45
Mouse 6	49	73	53	54	28
Mouse 7	28	55	37	34	56
Mouse 8	34	32	33	29	31
Mouse 9	44	42	46	30	36
Mouse 10	24	37	27	16	14
blank	blank
blank	blank
Inactive lever presses
	Baseline (3 day prior)	Baseline (2 day prior)	Basesline (1 day prior)	Manipulation	1 day after stimulation
Mouse 1	0	0	0	0	0
Mouse 2	5	6	6	7	3
Mouse 3	1	5	0	2	2
Mouse 4	1	0	2	0	2
Mouse 5	2	5	1	1	4
Mouse 6	11	9	1	3	6
Mouse 7	3	5	1	4	4
Mouse 8	6	8	2	1	0
Mouse 9	4	2	4	3	8
Mouse 10	0	0	3	0	0
blank
blank
Infusions
	Baseline (3 day prior)	Baseline (2 day prior)	Basesline (1 day prior)	Manipulation	1 day after stimulation
Mouse 1	9	12	32	32	29
Mouse 2	31	27	27	19	24
Mouse 3	10	16	36	38	39
Mouse 4	36	39	37	37	35
Mouse 5	31	42	38	36	37
Mouse 6	42	51	37	39	26
Mouse 7	27	49	37	33	38
Mouse 8	29	27	33	27	27
Mouse 9	25	37	38	29	35
Mouse 10	24	34	23	15	13

## Sheet: Fig.3G
Ppp1r1b-SSFO		blank
blank		blank
Active lever presses		blank
	Baseline (3 day prior)	Baseline (2 day prior)	Basesline (1 day prior)	Manipulation	1 day after stimulation
Mouse 1	30	28	45	47	36
Mouse 2	51	42	46	40	39
Mouse 3	75	59	42	52	30
Mouse 4	50	46	54	46	43
Mouse 5	43	32	29	34	32
Mouse 6	30	40	32	40	30
blank
blank
Inactive lever presses
	Baseline (3 day prior)	Baseline (2 day prior)	Basesline (1 day prior)	Manipulation	1 day after stimulation
Mouse 1	0	0	0	0	1
Mouse 2	6	4	15	25	16
Mouse 3	46	25	4	6	11
Mouse 4	10	23	14	15	6
Mouse 5	7	5	5	5	9
Mouse 6	0	0	0	0	1
blank
blank
Infusions
	Baseline (3 day prior)	Baseline (2 day prior)	Basesline (1 day prior)	Manipulation	1 day after stimulation
Mouse 1	26	27	36	38	30
Mouse 2	41	38	40	36	35
Mouse 3	48	35	30	38	25
Mouse 4	43	42	42	39	36
Mouse 5	31	29	28	31	29
Mouse 6	29	31	29	34	27

## Sheet: Fig.3K
Rspo2-hM4D		blank
blank		blank
blank		blank				Active lever presses
blank			day 1	day 2	day 3	day 4	day 5	day 6	day 7	day 8	day 9	day 10
	Intra-NAc saline	mouse 1	8	20	11	39	6	9	6	8	4	2
		mouse 2	0	59	26	40	45	54	54	38	24	12
		mouse 3	0	0	0	2	19	24	20	16	32	20																				Rspo2 inf	4	14	11	28	6	8	4	7	3	2
		mouse 4	2	11	24	15	6	9	16	10	8	15																				saline	0	39	22	28	29	44	41	29	21	11
		mouse 5	16	31	27	19	12	4	14	3	3	7																					0	0	0	2	11	17	19	15	28	15
		mouse 6	38	16	12	29	32	33	48	52	26	49																					2	10	17	13	6	8	15	9	8	13
		mouse 7	6	7	0	3	3	9	14	21	33	57																					13	25	22	16	11	4	11	3	3	4
		mouse 8	1	5	4	5	2	4	0	2	1	4																					26	14	11	23	24	26	32	32	19	28
		mouse 9	26	40	23	19	38	54	42	45	43	35																					6	6	0	3	2	5	13	19	28	49
		mouse 10	28	4	7	5	7	2	6	4	7	6																					1	4	3	4	2	3	0	2	1	4
		mouse 11	74	33	56	25	27	21	23	19	28	23																					17	34	20	19	38	45	39	40	40	32
		mouse 12	69	16	0	1	36	59	38	33	29	93																					23	4	5	4	7	1	5	4	6	5
		mouse 13	8	6	21	15	40	29	16	31	8	13																					44	23	31	23	23	19	18	15	25	21
blank
blank
blank						Inactive lever presses
			day 1	day 2	day 3	day 4	day 5	day 6	day 7	day 8	day 9	day 10
		mouse 1	0	1	3	0	6	1	0	0	0	0
		mouse 2	0	0	2	2	3	5	4	7	7	4
		mouse 3	0	0	0	0	8	3	6	7	8	1
		mouse 4	3	3	0	0	1	0	3	1	1	2
		mouse 5	43	52	52	25	23	10	17	4	3	7
		mouse 6	13	6	0	2	0	0	7	7	4	6
		mouse 7	3	1	4	5	11	12	22	8	6	17
		mouse 8	1	5	4	5	5	3	0	0	0	0
		mouse 9	5	12	2	2	6	1	0	0	1	3
		mouse 10	5	1	5	2	2	2	2	2	4	4
		mouse 11	1	20	3	11	10	10	9	1	4	0
		mouse 12	0	1	0	2	0	0	3	3	3	6
		mouse 13	0	0	1	0	1	1	1	1	0	1
blank
blank
blank						Active lever presses
			day 1	day 2	day 3	day 4	day 5	day 6	day 7	day 8	day 9	day 10
	Intra-NAc CNO	mouse 1	2	2	3	4	8	5	4	4	2	2																				Rspo2 inf	2	1	1	3	5	4	3	3	2	2
		mouse 2	0	1	0	3	2	0	2	21	23	13																				CNO	0	1	0	2	2	0	1	21	18	11
		mouse 3	20	3	0	4	9	14	10	28	35	18																					9	3	0	4	5	12	6	23	30	16
		mouse 4	0	0	5	4	2	4	2	7	1	8																					0	0	2	3	1	4	2	7	1	6
		mouse 5	27	20	41	46	30	41	29	24	22	30																					16	14	36	37	28	33	26	18	17	27
		mouse 6	11	6	0	2	3	1	1	6	5	3																					10	6	0	2	2	1	1	4	4	3
		mouse 7	6	4	8	43	35	29	32	32	36	34																					6	4	8	32	31	26	30	32	30	32
		mouse 8	5	8	7	11	15	49	40	41	43	48																					4	5	4	10	14	43	37	39	41	43
		mouse 9	41	12	6	4	34	14	9	17	12	8																					34	9	5	4	28	12	9	16	9	6
		mouse 10	36	4	23	1	2	9	4	2	2	0																					29	4	19	1	2	8	4	1	1	0
		mouse 11	23	7	11	29	38	13	18	14	15	43																					18	5	9	23	29	13	16	11	9	32
		mouse 12	34	12	14	12	0	2	34	3	0	3																					22	9	12	8	0	2	10	2	0	3
		mouse 13	38	48	43	47	52	53	56	47	115	44																					25	37	27	26	44	38	45	40	59	35
blank
blank
blank						Inactive lever presses
blank			day 1	day 2	day 3	day 4	day 5	day 6	day 7	day 8	day 9	day 10
		mouse 1	1	0	1	2	0	0	2	1	1	2
		mouse 2	1	0	0	1	1	4	1	17	19	30
		mouse 3	8	18	6	4	4	12	19	22	28	17
		mouse 4	1	0	0	0	4	0	0	1	2	1
		mouse 5	1	1	0	0	2	8	13	13	1	3
		mouse 6	11	2	1	2	4	2	0	1	6	16
		mouse 7	7	6	4	9	10	17	14	8	7	12
		mouse 8	0	0	3	0	1	3	0	1	2	1
		mouse 9	9	1	4	1	7	3	2	8	7	1
		mouse 10	6	3	5	3	3	3	7	3	0	1
		mouse 11	4	0	1	2	2	0	1	1	0	1
		mouse 12	3	2	1	1	0	0	0	1	0	1
		mouse 13	4	2	6	3	1	2	4	5	7	0

## Sheet: Fig.3L
Rspo2-hM4D		blank
blank		blank
blank		blank				Cocaine infusions
			day 1	day 2	day 3	day 4	day 5	day 6	day 7	day 8	day 9	day 10
	Intra-NAc saline	mouse 1	4	14	11	28	6	8	4	7	3	2
		mouse 2	0	39	22	28	29	44	41	29	21	11
		mouse 3	0	0	0	2	11	17	19	15	28	15
		mouse 4	2	10	17	13	6	8	15	9	8	13
		mouse 5	13	25	22	16	11	4	11	3	3	4
		mouse 6	26	14	11	23	24	26	32	32	19	28
		mouse 7	6	6	0	3	2	5	13	19	28	49
		mouse 8	1	4	3	4	2	3	0	2	1	4
		mouse 9	17	34	20	19	38	45	39	40	40	32
		mouse 10	23	4	5	4	7	1	5	4	6	5
		mouse 11	44	23	31	23	23	19	18	15	25	21
		mouse 12	46	15	0	1	32	46	30	26	25	36
		mouse 13	8	4	19	13	39	26	14	30	8	11
blank
blank
blank
blank						Cocaine infusions
			day 1	day 2	day 3	day 4	day 5	day 6	day 7	day 8	day 9	day 10
	Intra-NAc CNO	mouse 1	2	1	1	3	5	4	3	3	2	2
		mouse 2	0	1	0	2	2	0	1	21	18	11
		mouse 3	9	3	0	4	5	12	6	23	30	16
		mouse 4	0	0	2	3	1	4	2	7	1	6
		mouse 5	16	14	36	37	28	33	26	18	17	27
		mouse 6	10	6	0	2	2	1	1	4	4	3
		mouse 7	6	4	8	32	31	26	30	32	30	32
		mouse 8	4	5	4	10	14	43	37	39	41	43
		mouse 9	34	9	5	4	28	12	9	16	9	6
		mouse 10	29	4	19	1	2	8	4	1	1	0
		mouse 11	18	5	9	23	29	13	16	11	9	32
		mouse 12	22	9	12	8	0	2	10	2	0	3
		mouse 13	25	37	27	26	44	38	45	40	59	35

## Sheet: Fig.3M
Ppp1r1b-hM4D		blank
blank		blank
blank		blank				Active lever presses
blank			day 1	day 2	day 3	day 4	day 5	day 6	day 7	day 8	day 9	day 10
	Intra-NAc saline	mouse 1	39	33	40	26	32	28	28	20	20	16
		mouse 2	8	18	26	30	19	30	26	19	13	12
		mouse 3	5	4	37	28	49	36	33	60	59	62
		mouse 4	0	1	0	1	0	1	3	8	2	1
		mouse 5	32	5	44	54	33	36	24	40	26	24
		mouse 6	0	20	19	11	24	10	6	3	9	30
		mouse 7	23	7	2	2	12	5	9	30	18	14
		mouse 8	32	31	18	22	22	36	65	58	56	49
		mouse 9	83	74	50	47	33	34	36	56	76	59
		mouse 10	15	15	16	14	12	31	22	23	21	24
		mouse 11	0	2	0	0	0	0	0	0	0	17
		mouse 12	42	15	30	27	46	46	42	23	11	4
		mouse 13	4	9	9	16	6	7	16	12	6	7
blank
blank
blank						Inactive lever presses
			day 1	day 2	day 3	day 4	day 5	day 6	day 7	day 8	day 9	day 10
		mouse 1	5	2	6	16	16	8	12	16	11	3
		mouse 2	3	6	12	32	40	24	16	19	13	7
		mouse 3	5	0	13	5	30	12	9	10	10	2
		mouse 4	0	0	0	0	3	0	1	0	2	0
		mouse 5	1	0	4	5	1	4	1	5	8	7
		mouse 6	0	11	27	55	50	42	7	5	7	41
		mouse 7	9	1	1	0	1	0	1	1	2	2
		mouse 8	7	8	6	1	0	0	0	1	1	2
		mouse 9	3	4	3	3	1	2	3	8	2	2
		mouse 10	2	3	0	1	0	4	3	7	3	3
		mouse 11	0	1	0	0	0	0	0	0	0	1
		mouse 12	10	6	10	15	11	8	15	11	2	0
		mouse 13	1	1	6	18	6	6	8	8	9	7
blank
blank
blank						Active lever presses
blank			day 1	day 2	day 3	day 4	day 5	day 6	day 7	day 8	day 9	day 10
	Intra-NAc CNO	mouse 1	16	25	31	20	24	16	5	2	5	10
		mouse 2	4	46	25	20	21	26	30	25	36	25
		mouse 3	2	1	0	2	2	2	0	0	2	1
		mouse 4	23	79	48	25	50	57	32	44	57	54
		mouse 5	23	70	36	21	48	25	15	12	8	17
		mouse 6	16	283 (outlier)	658 (outlier)	279 (outlier)	72	47	80	74	59	56
		mouse 7	46	53	35	40	37	30	20	35	40	58
		mouse 8	48	26	20	27	31	47	36	43	60	38
		mouse 9	25	6	32	30	29	22	20	23	22	11
		mouse 10	15	22	16	8	7	6	6	5	9	5
		mouse 11	10	9	4	16	10	34	41	35	23	71
		mouse 12	28	22	28	41	36	24	29	13	15	30
		mouse 13	3	0	0	2	1	2	2	29	1	1
blank
blank
blank						Inactive lever presses
blank			day 1	day 2	day 3	day 4	day 5	day 6	day 7	day 8	day 9	day 10
		mouse 1	4	6	17	10	22	18	10	5	17	4
		mouse 2	6	35	37	22	23	74	112	36	16	2
		mouse 3	4	1	1	1	1	1	1	1	1	0
		mouse 4	11	8	3	2	5	7	4	5	6	4
		mouse 5	2	2	5	4	5	6	5	2	2	2
		mouse 6	5	11	46	3	3	7	4	0	1	4
		mouse 7	7	7	2	1	2	1	5	0	0	2
		mouse 8	8	4	1	1	2	10	1	3	9	5
		mouse 9	4	3	5	1	1	1	1	1	1	1
		mouse 10	1	5	3	0	1	1	0	1	0	0
		mouse 11	14	5	1	3	1	1	2	0	0	7
		mouse 12	8	3	3	3	13	10	10	1	2	5
		mouse 13	0	0	0	0	0	0	0	0	0	0

## Sheet: Fig.3N
Ppp1r1b-hM4D		blank
blank		blank
blank		blank				Cocaine infusions
blank			day 1	day 2	day 3	day 4	day 5	day 6	day 7	day 8	day 9	day 10
	Intra-NAc saline	mouse 1	25	25	34	23	27	23	25	17	20	15
		mouse 2	3	14	21	28	18	22	23	17	11	10
		mouse 3	5	3	26	23	35	25	26	45	42	40
		mouse 4	0	1	0	1	0	1	3	4	1	1
		mouse 5	25	4	31	40	24	28	21	26	21	19
		mouse 6	0	11	15	10	22	8	4	3	6	27
		mouse 7	16	7	2	2	9	3	8	19	14	12
		mouse 8	24	21	15	16	14	30	54	48	48	46
		mouse 9	58	46	37	30	28	33	51	59	50	50
		mouse 10	11	12	14	14	10	22	21	21	18	24
		mouse 11	0	2	0	0	0	0	0	0	0	9
		mouse 12	35	12	26	24	37	36	37	18	11	4
		mouse 13	3	6	6	11	4	5	11	9	5	5
blank
blank
blank
blank						Cocaine infusions
blank			day 1	day 2	day 3	day 4	day 5	day 6	day 7	day 8	day 9	day 10
	Intra-NAc CNO	mouse 1	8	25	29	18	22	15	5	2	4	10
		mouse 2	3	31	20	16	18	21	22	20	23	18
		mouse 3	1	1	0	2	2	2	0	0	2	1
		mouse 4	12	50	36	18	37	45	25	33	41	45
		mouse 5	17	48	24	15	35	19	15	10	7	15
		mouse 6	13	90 (outlier)	88 (outlier)	73 (outlier)	44	33	44	44	41	36
		mouse 7	35	37	30	31	29	25	17	26	37	28
		mouse 8	35	25	19	25	28	41	30	35	40	30
		mouse 9	21	6	22	25	26	20	18	21	19	10
		mouse 10	13	19	12	7	7	5	5	4	6	5
		mouse 11	9	8	3	14	6	30	37	33	21	56
		mouse 12	23	18	21	29	31	21	21	12	13	24
		mouse 13	2	0	0	1	1	2	2	21	1	1
