# Supplementary material for: Cue- versus reward-encoding basolateral amygdala projections to nucleus accumbens
Source: eLife. 2023 Nov 14;12:e89766. doi: 10.7554/eLife.89766 (PMC10645419; doi:10.7554/eLife.89766)
Supplement: Figure 4—source data 1. [file elife-89766-fig4-data1.xlsx]

## Sheet: Fig.4M
Rspo2-hM4D		blank
blank		blank
blank		blank				Active lever presses
blank			day 1	day 2	day 3	day 4	day 5	day 6	day 7	day 8	day 9	day 10
	Intra-NAc saline	mouse 1	44	33	50	44	57	56	43	80	41	75
		mouse 2	35	5	27	26	32	40	41	47	34	45
		mouse 3	38	39	24	41	75	71	50	48	41	45
		mouse 4	34	125	65	59	68	60	57	65	25	31
		mouse 5	7	39	33	11	7	13	17	22	19	37
		mouse 6	36	49	45	44	52	40	40	38	50	44
		mouse 7	32	32	28	51	64	150	131	95	92	74
		mouse 8	43	96	82	62	43	39	15	9	47	50
						Inactive lever presses
			day 1	day 2	day 3	day 4	day 5	day 6	day 7	day 8	day 9	day 10
		mouse 1	1	0	0	0	0	2	11	14	2	1
		mouse 2	3	1	1	3	7	7	5	6	12	14
		mouse 3	2	1	4	0	5	8	0	3	3	6
		mouse 4	3	29	9	7	11	9	7	1	0	2
		mouse 5	3	2	19	3	9	4	8	7	1	7
		mouse 6	1	1	1	1	4	0	2	1	3	1
		mouse 7	4	2	4	0	1	0	1	0	0	2
		mouse 8	7	4	1	5	13	3	4	4	4	6
blank
blank
blank
blank
blank
blank
blank						Active lever presses
			day 1	day 2	day 3	day 4	day 5	day 6	day 7	day 8	day 9	day 10
	Intra-NAc CNO	mouse 1	14	15	22	28	28	38	43	42	36	37
		mouse 2	21	10	17	32	43	34	32	15	35	31
		mouse 3	28	27	20	36	32	33	39	37	42	46
		mouse 4	41	23	54	44	63	47	40	52	43	55
		mouse 5	32	31	33	31	48	35	55	56	49	57
		mouse 6	25	26	22	58	55	42	43	40	32	35
		mouse 7	97	48	56	56	49	14	36	213	77	46
		mouse 8	93	117	67	56	84	70	60	69	68	16
		mouse 9	35	7	58	32	30	24	23	27	32	39
blank
blank
blank						Inactive lever presses
blank			day 1	day 2	day 3	day 4	day 5	day 6	day 7	day 8	day 9	day 10
		mouse 1	1	2	1	1	0	5	2	3	0	0
		mouse 2	5	1	0	0	0	0	0	1	0	0
		mouse 3	9	6	2	3	9	9	4	9	5	5
		mouse 4	0	1	0	0	0	0	0	0	1	1
		mouse 5	0	2	7	6	4	0	0	1	1	3
		mouse 6	0	1	0	0	3	2	1	3	4	2
		mouse 7	13	18	19	25	10	9	7	120	37	20
		mouse 8	13	5	14	7	8	7	5	11	14	13
		mouse 9	5	30	16	9	13	10	9	14	11	5

## Sheet: Fig.4N
Rspo2-hM4D		blank
blank		blank
blank		blank				Cocaine infusions
blank			day 1	day 2	day 3	day 4	day 5	day 6	day 7	day 8	day 9	day 10
	Intra-NAc saline	mouse 1	23	28	32	33	34	34	34	51	35	40
		mouse 2	28	5	25	25	28	36	34	40	31	35
		mouse 3	27	26	22	35	42	39	37	40	35	37
		mouse 4	24	85	54	44	48	43	50	49	22	27
		mouse 5	7	26	21	5	6	10	14	16	17	27
		mouse 6	16	31	30	32	37	31	35	36	38	36
		mouse 7	22	18	23	41	49	80	74	73	64	57
		mouse 8	32	60	50	46	30	32	13	7	35	43
blank
blank
blank
blank						Cocaine infusions
blank			day 1	day 2	day 3	day 4	day 5	day 6	day 7	day 8	day 9	day 10
	Intra-NAc CNO	mouse 1	14	13	18	20	21	29	34	33	29	29
		mouse 2	19	10	16	30	34	30	26	12	31	28
		mouse 3	23	23	17	33	27	29	34	33	33	37
		mouse 4	27	20	30	28	39	28	27	29	31	39
		mouse 5	20	22	30	28	33	31	45	41	42	46
		mouse 6	18	22	22	46	44	37	38	33	30	34
		mouse 7	60	34	40	41	34	12	31	64	42	31
		mouse 8	23	5	27	18	14	14	18	20	25	28
		mouse 9	50	58	45	38	57	44	46	49	45	14

## Sheet: Fig.4O
Rspo2-hM4D		blank
blank		blank
blank		blank	Active lever presses
			day 7	day 21	day 45
	Intra-NAc saline	mouse 1	34	44	32
		mouse 2	55	40	44
		mouse 3	101	54	31
		mouse 4	36	32	16
		mouse 5	72	134	41
		mouse 6	52	31	25
		mouse 7	65	35	16
		mouse 8	20	78	73
blank
blank
blank
blank			Inactive lever presses
			day 7	day 21	day 45
		mouse 1	9	27	15
		mouse 2	34	23	10
		mouse 3	9	8	21
		mouse 4	2	7	2
		mouse 5	17	25	31
		mouse 6	15	9	2
		mouse 7	1	16	10
		mouse 8	17	13	22
blank
blank
blank
blank
blank
blank
blank			Active lever presses
			day 7	day 21	day 45
	Intra-NAc CNO	mouse 1	53	59	41
		mouse 2	51	40	24
		mouse 3	46	98	32
		mouse 4	46	51	46
		mouse 5	84	48	51
		mouse 6	41	39	15
		mouse 7	37	42	40
		mouse 8	29	32	20
		mouse 9	25	38	24
blank
blank
blank			Inactive lever presses
			day 7	day 21	day 45
		mouse 1	14	16	13
		mouse 2	1	6	7
		mouse 3	14	19	8
		mouse 4	9	13	15
		mouse 5	9	9	15
		mouse 6	13	7	0
		mouse 7	49	3	7
		mouse 8	5	3	8
		mouse 9	5	6	11

## Sheet: Fig.4P
Ppp1r1b-hM4D		blank
blank		blank
blank		blank				Active lever presses
blank			day 1	day 2	day 3	day 4	day 5	day 6	day 7	day 8	day 9	day 10
	Intra-NAc saline	mouse 1	166	64	41	46	41	34	52	51	49	24
		mouse 2	47	42	44	70	69	77	92	99	61	61
		mouse 3	87	35	34	37	30	54	40	29	36	47
		mouse 4	22	26	33	28	33	32	31	53	45	41
		mouse 5	19	47	21	38	32	37	23	18	16	9
		mouse 6	60	55	44	41	40	30	38	48	52	40
		mouse 7	28	29	36	24	30	27	16	28	23	30
		mouse 8	20	12	38	51	64	91	93	34	45	33
		mouse 9	82	44	6	120	83	71	72	35	77	33
blank
blank
blank						Inactive lever presses
blank			day 1	day 2	day 3	day 4	day 5	day 6	day 7	day 8	day 9	day 10
		mouse 1	5	14	2	5	4	6	1	4	6	4
		mouse 2	130	24	19	93	37	5	33	20	3	8
		mouse 3	11	16	8	10	9	20	9	10	8	5
		mouse 4	1	0	1	5	1	10	23	19	14	17
		mouse 5	2	0	3	6	2	4	3	2	4	1
		mouse 6	1	12	8	8	6	9	12	11	8	6
		mouse 7	0	3	5	8	7	1	3	6	3	10
		mouse 8	6	5	3	8	7	11	13	14	8	5
		mouse 9	18	18	0	0	7	42	44	8	2	5
blank
blank
blank
blank
blank
blank						Active lever presses
			day 1	day 2	day 3	day 4	day 5	day 6	day 7	day 8	day 9	day 10
	Intra-NAc CNO	mouse 1	39	30	28	19	9	41	35	26	29	37
		mouse 2	37	39	32	37	46	52	56	69	64	41
		mouse 3	8	6	4	38	43	40	33	55	37	49
		mouse 4	12	35	26	15	11	12	25	20	52	43
		mouse 5	46	34	22	32	30	33	44	39	47	45
		mouse 6	39	30	33	39	50	24	58	56	69	37
		mouse 7	9	25	43	36	36	26	15	13	15	21
		mouse 8	147	103	73	60	87	51	53	39	46	27
		mouse 9	33	68	180	56	34	79	84	25	40	24
blank
blank
blank						Inactive lever presses
			day 1	day 2	day 3	day 4	day 5	day 6	day 7	day 8	day 9	day 10
		mouse 1	2	0	1	0	0	1	1	1	0	0
		mouse 2	0	2	1	7	7	9	6	14	14	11
		mouse 3	0	2	4	0	0	0	0	0	0	0
		mouse 4	0	0	1	1	2	0	2	1	0	0
		mouse 5	9	10	12	7	6	12	6	6	10	11
		mouse 6	5	4	13	6	7	4	4	6	10	5
		mouse 7	3	2	2	2	23	10	20	9	18	7
		mouse 8	0	0	0	0	3	2	7	4	2	2
		mouse 9	15	4	10	9	18	13	6	3	12	7

## Sheet: Fig.4Q
Ppp1r1b-hM4D		blank
blank		blank
blank		blank				Cocaine infusions
blank			day 1	day 2	day 3	day 4	day 5	day 6	day 7	day 8	day 9	day 10
	Intra-NAc saline	mouse 1	43	31	32	30	29	26	31	35	34	16
		mouse 2	32	34	35	43	53	56	53	52	40	39
		mouse 3	36	29	28	24	27	29	31	27	31	36
		mouse 4	20	26	32	26	29	28	25	42	37	32
		mouse 5	17	25	13	17	22	32	16	14	9	6
		mouse 6	39	32	30	33	29	29	35	36	42	38
		mouse 7	21	26	25	19	25	24	14	22	22	23
		mouse 8	15	7	23	27	45	71	71	31	37	29
		mouse 9	59	33	5	46	39	41	44	24	36	21
blank
blank
blank
blank						Cocaine infusions
			day 1	day 2	day 3	day 4	day 5	day 6	day 7	day 8	day 9	day 10
	Intra-NAc CNO	mouse 1	32	24	25	18	7	39	33	26	28	32
		mouse 2	28	34	30	30	37	41	41	45	42	33
		mouse 3	8	5	4	36	38	30	30	32	28	36
		mouse 4	11	22	17	12	11	11	23	19	42	42
		mouse 5	34	28	16	28	26	31	36	33	39	35
		mouse 6	29	26	24	34	45	19	25	55	29	51
		mouse 7	7	21	22	15	12	11	11	10	7	29
		mouse 8	81	64	55	47	52	30	41	29	33	23
		mouse 9	10	29	63	32	27	58	52	21	31	21

## Sheet: Fig.4R
Ppp1r1b-hM4D		blank
blank		blank
blank		blank	Active lever presses
			day 7	day 21	day 45
	Intra-NAc saline	mouse 1	74	41	52
		mouse 2	106	63	70
		mouse 3	78	68	45
		mouse 4	74	103	63
		mouse 5	88	64	43
		mouse 6	72	85	80
		mouse 7	38	12	25
		mouse 8	38	86	47
		mouse 9	44	26	20
blank
blank
blank			Inactive lever presses
			day 7	day 21	day 45
		mouse 1	14	19	19
		mouse 2	51	26	17
		mouse 3	18	31	11
		mouse 4	63	41	36
		mouse 5	17	18	3
		mouse 6	22	8	24
		mouse 7	6	8	14
		mouse 8	24	27	19
		mouse 9	12	12	2
blank
blank
blank
blank
blank
blank			Active lever presses
			day 7	day 21	day 45
	Intra-NAc CNO	mouse 1	64	30	28
		mouse 2	43	72	27
		mouse 3	55	32	31
		mouse 4	106	72	30
		mouse 5	48	29	16
		mouse 6	38	42	28
		mouse 7	27	22	6
		mouse 8	26	20	13
		mouse 9	15	47	Died before day 45
blank
blank
blank			Inactive lever presses
blank			day 7	day 21	day 45
		mouse 1	15	8	5
		mouse 2	20	19	22
		mouse 3	8	5	8
		mouse 4	22	14	7
		mouse 5	32	41	24
		mouse 6	11	10	1
		mouse 7	5	7	4
		mouse 8	10	4	1
		mouse 9	7	38	Died before day 45

## Sheet: Fig.4S
Rspo2-hM3D		blank
blank		blank
blank		blank				Active lever presses
blank			day 1	day 2	day 3	day 4	day 5	day 6	day 7	day 8	day 9	day 10
	Intra-NAc saline	mouse 1	73	160	62	59	43	35	24	8	32	13
		mouse 2	20	36	31	26	28	37	32	28	18	31
		mouse 3	51	41	35	27	20	30	29	29	24	28
		mouse 4	28	26	35	46	45	51	47	44	44	56
		mouse 5	44	35	22	20	29	31	18	5	15	22
		mouse 6	112	89	45	61	25	34	79	33	65	53
		mouse 7	27	16	46	34	39	34	44	37	56	31
blank
blank
blank
blank
blank						Inactive lever presses
			day 1	day 2	day 3	day 4	day 5	day 6	day 7	day 8	day 9	day 10
		mouse 1	1	2	1	1	0	0	2	0	1	0
		mouse 2	0	0	1	0	0	3	15	7	4	2
		mouse 3	0	2	3	2	2	2	11	7	15	6
		mouse 4	1	1	2	2	0	1	0	10	45	41
		mouse 5	1	1	1	1	1	0	0	0	0	0
		mouse 6	0	0	4	2	4	1	0	3	1	1
		mouse 7	7	3	2	1	2	2	1	3	5	1
blank
blank
blank
blank
blank
blank
blank
blank						Active lever presses
			day 1	day 2	day 3	day 4	day 5	day 6	day 7	day 8	day 9	day 10
	Intra-NAc CNO	mouse 1	7	41	49	45	37	39	29	37	35	39
		mouse 2	20	24	43	38	43	46	25	19	31	35
		mouse 3	84	167	82	153	46	42	23	38	29	31
		mouse 4	76	63	84	80	28	103	75	83	34	61
		mouse 5	32	22	24	26	26	28	29	29	24	24
		mouse 6	33	53	95	102	43	60	57	60	48	64
		mouse 7	59	41	43	36	32	23	45	45	43	45
blank
blank
blank
blank
blank						Inactive lever presses
blank			day 1	day 2	day 3	day 4	day 5	day 6	day 7	day 8	day 9	day 10
		mouse 1	3	1	1	0	1	1	0	1	0	0
		mouse 2	2	2	2	9	2	4	5	1	1	0
		mouse 3	3	8	19	12	3	4	2	0	0	0
		mouse 4	4	0	4	10	8	5	0	1	0	0
		mouse 5	0	1	3	7	6	4	6	10	0	7
		mouse 6	3	5	3	4	3	3	4	2	6	2
		mouse 7	2	5	3	4	1	1	3	4	6	6

## Sheet: Fig.4T
Rspo2-hM3D		blank
blank		blank
blank		blank				Cocaine infusions
blank			day 1	day 2	day 3	day 4	day 5	day 6	day 7	day 8	day 9	day 10
	Intra-NAc saline	mouse 1	54	92	35	42	33	30	19	7	27	12
		mouse 2	16	28	27	24	23	29	18	26	16	23
		mouse 3	29	34	32	20	15	22	27	28	24	26
		mouse 4	26	24	31	38	37	39	38	36	35	40
		mouse 5	29	28	20	18	24	26	16	4	10	21
		mouse 6	46	47	35	46	21	28	63	27	48	42
		mouse 7	24	13	33	31	28	30	42	35	50	29
blank
blank
blank
blank
blank						Cocaine infusions
blank			day 1	day 2	day 3	day 4	day 5	day 6	day 7	day 8	day 9	day 10
	Intra-NAc CNO	mouse 1	7	35	43	36	30	33	28	36	33	32
		mouse 2	19	18	33	31	36	35	21	15	28	27
		mouse 3	33	87	44	83	32	35	18	31	26	23
		mouse 4	50	52	49	57	17	53	53	64	16	46
		mouse 5	26	16	18	21	21	23	24	25	19	15
		mouse 6	14	25	40	37	33	32	35	37	36	41
		mouse 7	38	33	30	23	18	17	34	32	28	32

## Sheet: Fig.4O 
Rspo2-hM3D		blank
blank		blank
blank		blank	Active lever presses
			day 7	day 21	day 45
	Intra-NAc saline	mouse 1	46	29	40
		mouse 2	64	45	45
		mouse 3	28	51	38
		mouse 4	34	Animal died beofre day 21
		mouse 5	23	20	13
		mouse 6	16	Animal died beofre day 21
		mouse 7	81	55	44
blank
blank
blank
blank
blank			Inactive lever presses
			day 7	day 21	day 45
		mouse 1	18	15	25
		mouse 2	7	6	3
		mouse 3	4	19	5
		mouse 4	12	Animal died beofre day 21
		mouse 5	1	3	1
		mouse 6	0	Animal died beofre day 21
		mouse 7	18	14	5
blank
blank
blank
blank
blank
blank
blank
blank			Active lever presses
			day 7	day 21	day 45
	Intra-NAc CNO	mouse 1	104	37	51
		mouse 2	42	43	34
		mouse 3	63	88	51
		mouse 4	64	64	62
		mouse 5	37	40	14
		mouse 6	47	93	29
		mouse 7	21	31	18
blank
blank
blank
blank
blank			Inactive lever presses
blank			day 7	day 21	day 45
		mouse 1	24	9	14
		mouse 2	10	3	4
		mouse 3	17	15	18
		mouse 4	11	11	11
		mouse 5	12	12	3
		mouse 6	4	11	8
		mouse 7	1	0	2

## Sheet: Fig.4V 
Ppp1r1b-hM3D		blank
blank		blank
blank		blank				Active lever presses
blank			day 1	day 2	day 3	day 4	day 5	day 6	day 7	day 8	day 9	day 10
	Intra-NAc saline	mouse 1	24	81	58	52	64	42	75	52	76	84	84
		mouse 2	16	59	64	47	54	55	48	21	64	33	33
		mouse 3	48	33	29	30	36	28	32	31	34	28	28
		mouse 4	9	30	37	38	33	31	16	31	21	23	23
		mouse 5	85	12	16	27	25	23	12	19	19	8	8
		mouse 6	37	43	72	39	43	48	25	38	29	21	21
blank
blank
blank
blank						Inactive lever presses
			day 1	day 2	day 3	day 4	day 5	day 6	day 7	day 8	day 9	day 10
		mouse 1	0	0	0	9	5	0	0	1	3	9
		mouse 2	2	0	7	0	0	0	3	4	2	0
		mouse 3	0	5	5	6	1	1	1	1	4	2
		mouse 4	6	6	6	3	11	8	4	4	8	4
		mouse 5	17	9	5	0	3	3	0	1	6	3
		mouse 6	20	17	17	14	14	9	8	7	3	3
blank
blank
blank
blank
blank
blank						Active lever presses
blank			day 1	day 2	day 3	day 4	day 5	day 6	day 7	day 8	day 9	day 10
	Intra-NAc CNO	mouse 1	39	22	28	28	35	38	30	16	37	29
		mouse 2	31	14	25	31	37	35	53	27	33	56
		mouse 3	82	65	22	8	16	28	32	29	43	44
		mouse 4	12	6	37	46	37	37	31	56	50	45
		mouse 5	41	18	22	16	34	28	30	20	36	32
		mouse 6	49	41	24	15	12	8	32	36	33	28
blank
blank
blank						Inactive lever presses
blank			day 1	day 2	day 3	day 4	day 5	day 6	day 7	day 8	day 9	day 10
		mouse 1	5	6	7	5	12	12	11	3	4	5
		mouse 2	0	0	0	0	0	0	1	0	0	0
		mouse 3	0	0	0	0	3	0	10	6	0	5
		mouse 4	0	1	1	0	0	2	3	4	3	8
		mouse 5	6	2	1	7	8	5	6	5	6	7
		mouse 6	3	1	3	0	1	1	2	7	6	10

[truncated: 2 more sheets: Fig.4W, Fig.4X]
